# Supplementary material
Source: publisher figshare collection journal article supplement (https://acs.figshare.com/ndownloader/files/34914872)
Supplement: Supplementary file 1 [file 34914872]

## Supporting Information

### **Armor-structured interconnected-porous membrane for corrosion-resistant and highly-permeable waste ammonium resource recycling**

Dongqing Liu <sup>†</sup>, Fuyun Yu <sup>†</sup>, Lingling Zhong <sup>†</sup>, Tao Zhang <sup>†</sup>, Ying Xu <sup>‡</sup>, Yingjie Qin <sup>§</sup>,  
Jun Ma <sup>†</sup>, Wei Wang <sup>†,\*</sup>,

<sup>†</sup> State Key Laboratory of Urban Water Resource and Environment (SKLUWRE),  
School of Environment, Harbin Institute of Technology, Harbin 150090, P. R. China

<sup>‡</sup> School of Ecology and Environment, Zhengzhou University, Zhengzhou 450000,  
China

<sup>§</sup> School of Chemical Engineering and Technology, Tianjin University, Tianjin 300072,  
China

\* Corresponding authors, Email: wangweirs@hit.edu.cn

Number of Pages: 20

Number of Sections: 2

Number of Methods: 10

Number of Tables: 2

Number of Figures: 15

## Section S1. Materials

Polyvinylidene fluoride (PVDF, Kynar® Hsv900, Mw~900,000) was purchased from Arkema Co., Ltd., China and Poly (vinylidene fluoride-co-hexafluoropropylene) (PVDF-HFP, Mw~400,000) was purchased from Sigma-Aldrich, China. Polytetrafluoroethylene (PTFE, DAIKIN® 10-120) nano-powders (120 nm) were obtained from Dongguan Xingwang Plastic Co. Ltd, China. N, N-dimethylacetamide (DMAc, 99.0%) and acetone (98%) were supplied from Shanghai Macklin Biochemical Co., Ltd and Tianjin Bohai Chemical Co., Ltd respectively. Ammonia chloride (NH<sub>4</sub>Cl, 99.5%) and sodium hydroxide (NaOH, 96%) were purchased from Tianjin Kermel Chemical Reagent Co., Ltd. Sulfuric acid (H<sub>2</sub>SO<sub>4</sub>, 98%) and hydrochloric acid (HCl, 36%) were obtained from Xilong Scientific Co., Ltd. The commercial PTFE and PP membranes with different pore sizes were supplied from Haining Chuangwei Filter Equipment Technology CO., Ltd. All chemicals were analytical grade reagents without special emphasis and used as received without further purification.

## Section S2. Characterizations

The surface morphology and structure of membranes were observed by field emission scanning electron microscope (FE-SEM, Sigma 500, ZEISS, Germany). The roughness of membranes containing different content of PTFE nano-powders was measured using atomic force microscope (AFM, Dimension FastScan, Bruker, Germany). The near-surface chemical compositions of NFMs before and after chemical treatment (soaking in alkaline solution (pH=12)) were analyzed by X-ray photoelectron

spectroscopy (XPS, ESCALAB 250Xi, USA). The mechanical properties of the membranes were tested by an electronic universal testing machine with a stretching speed of 50 mm/min provided by (Shenzhen) SUNS Technology Stock Co., Ltd. The zeta potential of the membrane surface was characterized by a streaming potential analyzer (SurPASS, Anton Paar GmbH, Austria) measured with a solution containing 1 mmol L<sup>-1</sup> KCl. The pore size distribution and gas permeability were measured via a bubble pressure method supplied from (Beijing) Beishide Instrument Technology Co., Ltd. Contact angles (CAs) were investigated by a contact angle goniometer (KINO SL200B, USA) and each value was the average of five parallel tests. The liquid entry pressure of water (LEP<sub>w</sub>) was measured using a homemade dead-end filtration device. Three-dimensional fluorescence spectrometer (F7000, Hitachi, Japan), which had an excitation wavelength of 200-450 nm, was qualitatively analyzed for fluorescent components in the solution. TOC/TN determinator (Multi N/C3100, Jena, Germany) and inductively coupled plasma-optical emission spectrometer (ICP-OES, PerkinElmer Optima 8300, USA) were used to analyze TN and TP in real wastewater respectively.

**Method S1.** Preparation of other comparative NFMs

A pristine PVDF solution was first prepared by dissolving 14 wt% PVDF in DMAc/acetone (70/30 wt%) solvent mixture with vigorous stirring at 80 °C for 4 h followed by overnight continuous stirring at room temperature. PH membranes with a spherical and spindle structure morphology was prepared by dissolving 14 wt% and 16 wt% PH in acetone/DMAc (70/30 wt%) mixed solvents, respectively. The electrospinning parameters were the same as those of armor-structured NFM (PTFE-PH/PVDF membrane). In particular, the humidity was controlled at 60±2% to ensure the morphology of the pristine PVDF nanofiber membranes. The pristine PVDF NFM (written as “PVDF NFM”), armor-structured NFM without PTFE doping (written as “PH/PVDF NFM”), and armor-structured NFM with different PTFE doping content (written as “ $\alpha$ -PTFE-PH/PVDF NFM”, where  $\alpha$  denotes the mass fraction of PTFE) were prepared in same conditions to reduce the influence on the membrane structure by electrospinning.

**Method S2.** Optimization principle and method of recycling ammonia.

In the GMAR process, we mainly use the “control variate” method to discuss the effects of flow rate, pH of feed solution, and length of module on ammonia recovery. Firstly, the length of the module was controlled to be 3 cm and the pH of the feed solution was kept at 11, and the effect of different flow rates (35 mL/min, 60 mL/min, 85 mL/min, 115 mL/min) on ammonia recovery was investigated. Secondly, a module with a length of 3 cm was still selected and the flow rate of solution on both sides of

the membrane was controlled at 60 mL/min to test the influence of feed solution with different pH (9, 10, 11, 12) on ammonia recovery. Finally, the solution was cross-flowed at a flow rate of 60 mL/min and the pH of feed solution was 11, and the effect of different length modules (3 cm, 6 cm, 9 cm) on ammonia recovery was studied.

**Method S3.** Ammonia vapor flux ( $F_{NH_3}$ , g  $NH_3$ -N  $m^{-2} h^{-1}$ ) and Overall mass transfer coefficient ( $K_{ov}$ )

The ammonia vapor flux ( $F_{NH_3}$ , g  $NH_3$ -N  $m^{-2} h^{-1}$ ) was calculated by measuring ammonium concentration in the absorbent side, which was expressed by Eq. (S1)

$$F_{NH_3-N} = \frac{c_a^t \cdot V_a}{1000 \times A \cdot t} \quad (S1)$$

where  $c_a^t$  is the concentration of  $NH_4^+$ -N in the absorbent solution at time t, mg  $L^{-1}$ ;  $V_a$  is the volume of the absorbent solution, L; A is the effective membrane area,  $m^2$ ; t is the reaction time, h.

The overall mass transfer coefficient ( $K_{ov}$ ) of IGM system was calculated by Eq. (S2)

$$K_{ov} = \frac{V_0}{At} \ln \left( \frac{c_f^0}{c_f^t} \right) \quad (S2)$$

where  $K_{ov}$  is the overall mass transfer coefficient,  $m s^{-1}$ ;  $V_0$  is the volume of the feed solution, L.  $c_f^0$  and  $c_f^t$  are the concentration of  $NH_4^+$ -N in the feed solution at the initial and t time, mg  $L^{-1}$ , respectively.

104

105       **Method S4.** Calculation of surface energy of armor-structured NFMs doped with  
106 different PTFE

107       The surface energy ( $\gamma_s$ ) is composed of the dispersion ( $\gamma^D$ ) and the polar bond ( $\gamma^P$ )  
108 forces, which can be calculated from the contact angles of two different solvents.<sup>1</sup> In  
109 this study, the surface energy of the fabricated membranes is measured by Owens-  
110 Wendt method, as follow Eq. (S3).

$$111 \quad \gamma_L(1 + \cos \theta) = 2(\sqrt{\gamma_{SG}^D \cdot \gamma_{LG}^D} + \sqrt{\gamma_{SG}^P \cdot \gamma_{LG}^P}) \quad (S3)$$

112       where  $\gamma_L$  is the interfacial tension of liquid.  $\gamma_{SG}^D$  and  $\gamma_{LG}^D$  are the dispersive component  
113 of solid and liquid, respectively;  $\gamma_{SG}^P$  and  $\gamma_{LG}^P$  are the polar component of solid and  
114 liquid, respectively; In this study, we analyze the surface energy by measuring the  
115 contact angle between water and diiodomethane on the membrane surface. The related  
116 parameters of the aforementioned solvents are presented in Table S2.

117

118       **Method S5.** Calculation of liquid entry pressure

119       The liquid entry pressure of water (LEP<sub>w</sub>) is usually considered as the minimum  
120 transmembrane pressure for liquid water to overcome the hydrophobic surface and enter  
121 the membrane pore, which is an important criterion to measure the resistance of the  
122 membrane to wetting.<sup>2</sup> The LEP<sub>w</sub> of membrane can be calculated by Young-Laplace  
123 equation as follow Eq. (S4)

$$124 \quad LEP_w = - \frac{2B\gamma \cos \theta}{d_{max}} \quad (S4)$$

125       where B is a pore geometry coefficient;  $\gamma$  is the liquid surface tension,  $\gamma_{water}=72.58$   
126 mN/m;  $\theta$  is the water contact angle on the membrane surface, °;  $d_{max}$  is the maximum

127 membrane pore size,  $\mu\text{m}$ .

128 **Method S6.** Normalized calculation of TAN

129 
$$c_{N,TAN} = c_a^t \frac{V_t}{V_0} \quad (S5)$$

130 where  $c_{N,TAN}$  is the normalized concentration of  $\text{NH}_4^+$ -N in the absorbent solution, mg  
131  $\text{L}^{-1}$ ;  $c_a^t$  is the concentration of  $\text{NH}_4^+$ -N in the absorbent solution at time  $t$ , mg  $\text{L}^{-1}$ ;  $V_t$  is  
132 the volume of the initial absorbent solution, L;  $V_0$  is the volume of the feed solution, L.

133

134 **Method S7.** Dissociation equilibrium equations

135 Total ammonia nitrogen mainly exists in solution in the form of free ammonia ( $\text{NH}_3$ )  
136 and ammonium salt ( $\text{NH}_4^+$ ).<sup>3</sup> The dissociation equilibrium of ammonia in an aqueous  
137 solution can be described by Eq. (S6-9)

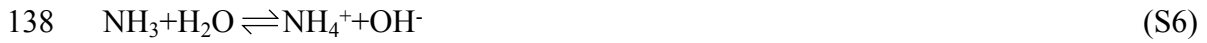

139 
$$K_b = \frac{[\text{NH}_4^+][\text{OH}^-]}{[\text{NH}_3]} \quad (S7)$$

140 
$$\alpha_{\text{NH}_3} = \frac{[\text{NH}_3]}{[\text{NH}_3] + [\text{NH}_4^+]} = \frac{[\text{OH}^-]}{K_b + [\text{OH}^-]} \quad (S8)$$

141 
$$\alpha_{\text{NH}_4^+} = \frac{[\text{NH}_4^+]}{[\text{NH}_3] + [\text{NH}_4^+]} = \frac{K_b}{K_b + [\text{OH}^-]} \quad (S9)$$

142 where  $[\text{NH}_4^+]$ ,  $[\text{NH}_3]$ , and  $[\text{OH}^-]$  are the equilibrium concentrations of ammonium,  
143 ammonia, and hydroxyl, respectively.  $\alpha$  is the concentration distribution fraction of  
144 different components.  $K_b$  is the dissociation equilibrium constant for ammonia, which  
145 is calculated by Eq. (S10).

$$\frac{K_b}{K_w} = e^{(6344/(273 + T))} \quad (S10)$$

where  $K_w$  is the ionization product constant of water, which is related to temperature.

#### Method S8. Calculation of porosity

The porosity for commercial and fabricated membranes was calculated using gravimetric method as follow Eq. (S11). Firstly, the dry weight of the 4cm×2cm membrane was weighed as  $W_1$ ; whereafter, the membrane was saturated in isopropyl alcohol/water (50/50 vol%) for 24h, and the liquid on the surface of the membrane was wiped with filter paper and weighed as  $W_2$ .<sup>4</sup>

$$\varepsilon = \frac{(W_2 - W_1)/D_{i/w}}{(W_2 - W_1)/D_{i/w} + W_1/D_p}$$

(S11)

where  $W_1$  and  $W_2$  are the dry and wet weights of membranes, g, respectively;  $D_{i/w}$  represents the density of isopropyl alcohol/water solution,  $D_{i/w}=0.8925$  g/cm<sup>3</sup>;  $D_p$  is the density of polymers, which is calculated by the weighted average of polymer content in the fabricated membranes.

#### Method S9. Analysis of Fluorescence Spectrum

To analyze the anti-wettability performance of the armor-structured NFM, the organic compounds in the solution on both sides of the membrane were characterized by fluorescence excitation-emission matrix spectrum (EEM). The EEM spectrums of



the samples were analyzed by PARAFAC analysis. The fluorescence intensities were detected at excitation (ex) wavelengths of 200-450 nm at 5 nm intervals, within the range of emission (em) wavelengths from 250 to 550 nm at 1 nm intervals. The EEM spectrum of Milli-Q water was deducted from each sample to remove Raman scatter peaks. The EEM components monitored in this study were region I (tyrosine-like, ex 200-250 nm, and em 250-330 nm), region II (tryptophan-like, ex 200-250 nm, and em 330-380 nm), region III (fulvic acid-like, ex 200-250 nm, and em 380-500 nm), region IV (soluble microbial byproduct substances, ex 250-340 nm, and em 300-380 nm), and V (humic acid-like, ex 250-400 nm, and em 380-500 nm).<sup>5, 6</sup>

#### **Method S10. Energy consumption analysis**

Energy consumption analysis of GMAR system based on ammonia flux,

$$E_{con} = \frac{W}{J_{NH_3}} \quad (S12)$$

where  $E_{con}$  is the energy consumption, kWh kg<sup>-1</sup>N; W is the electrical energy input to the system, kW h;  $J_{NH_3}$  is the ammonia flux in a certain time period, kgN.

184 Table S1. The first stage aerobic digestion effluent quality of actual hogger  
 185 (Harbin, China)

| Parameters | pH           | COD <sub>Cr</sub> | NH <sub>4</sub> <sup>+</sup> -N | TN            | TP          |
|------------|--------------|-------------------|---------------------------------|---------------|-------------|
| Value      | 8.46 (±0.02) | 454(±38) mg/L     | 945(±48) mg/L                   | 995(±38) mg/L | 10(±1) mg/L |

186  
 187 Table S2. Surface energy of solvents used in current study

| Solvents      | Surface tension<br>( $\gamma_L$ , mN/m) | Dispersive component<br>( $\gamma_L^D$ , mN/m) | Polar component<br>( $\gamma_L^P$ , mN/m) |
|---------------|-----------------------------------------|------------------------------------------------|-------------------------------------------|
| Water         | 72.8                                    | 21.8                                           | 51                                        |
| Diiodomethane | 50.8                                    | 50.8                                           | 0                                         |

188

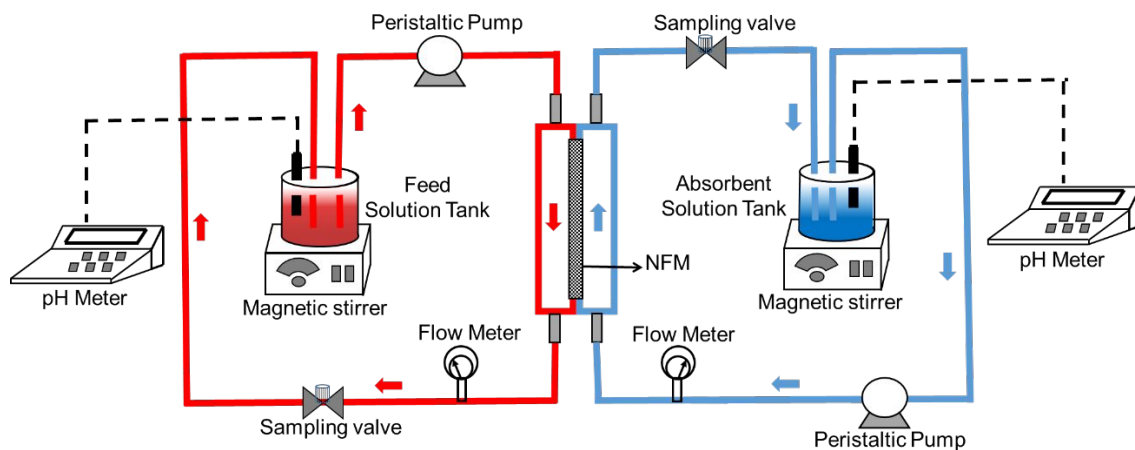

**Figure S1.** Experimental setup for lab-scale isothermal gas-permeable membrane system.

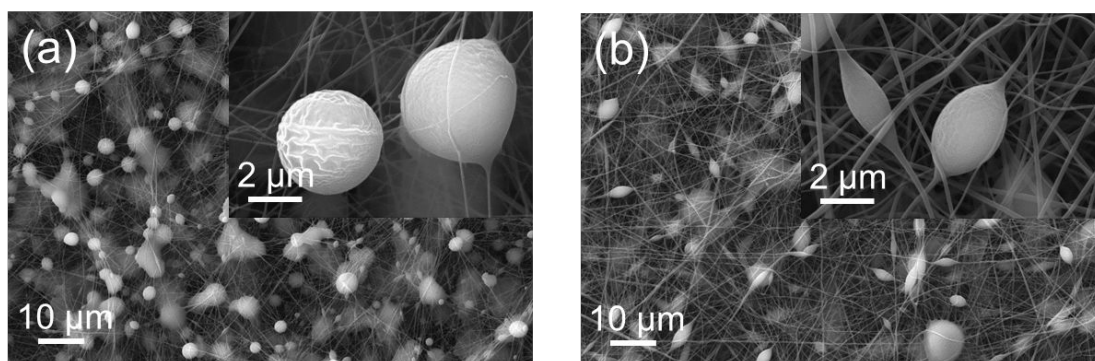

**Figure S2.** SEM images of PH membranes with different mass fraction (a) 14 wt% PH and (b) 16 wt%PH.

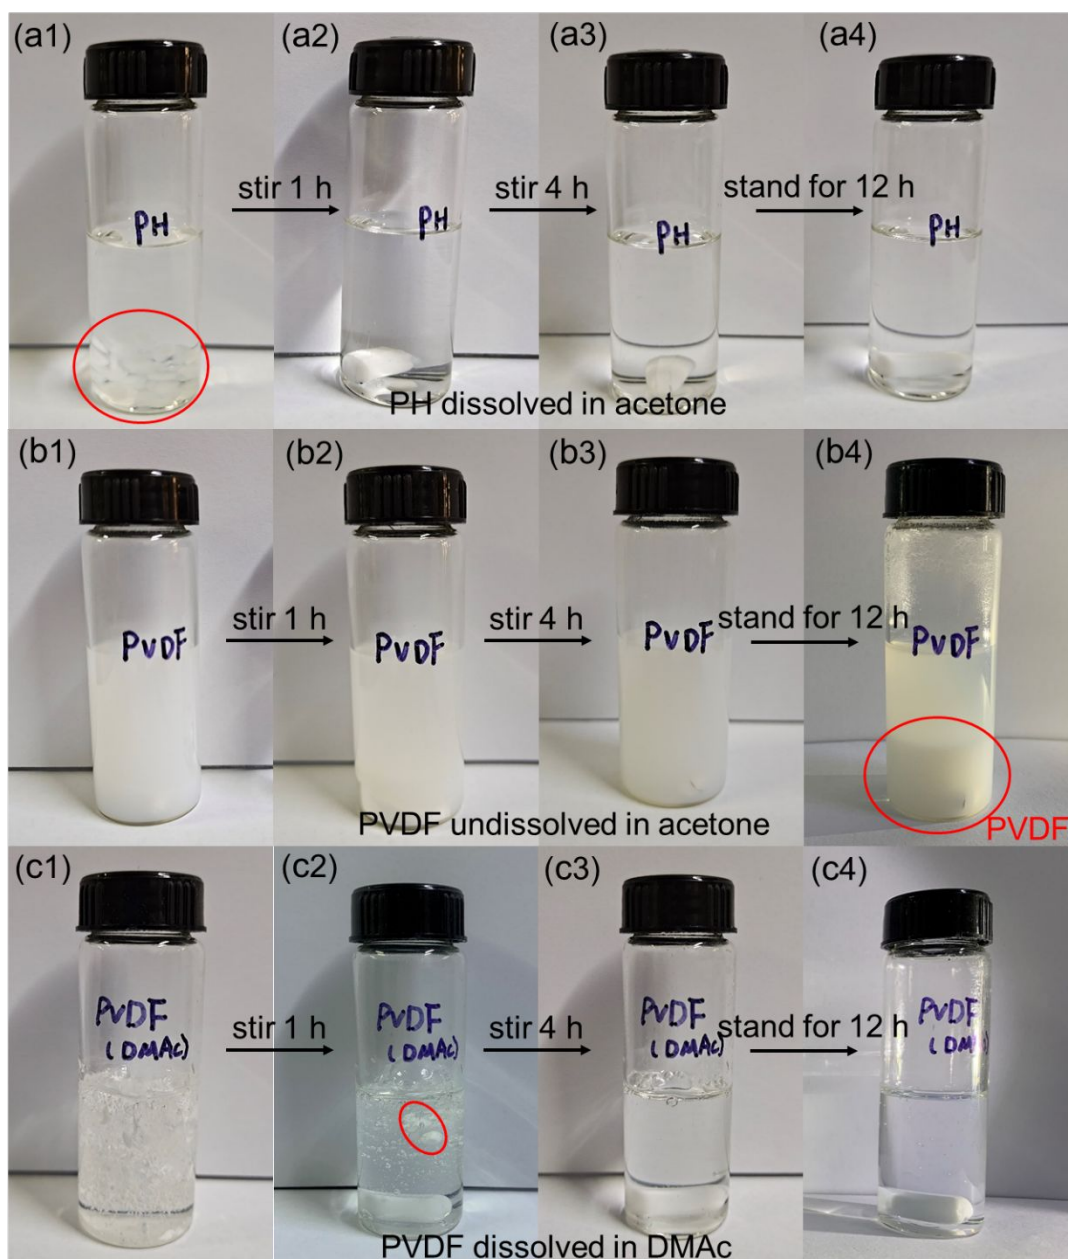

**Figure S3.** (a) Solubility of PH in acetone; (b) Solubility of PVDF in acetone; (c) Solubility of PVDF in DMAc.

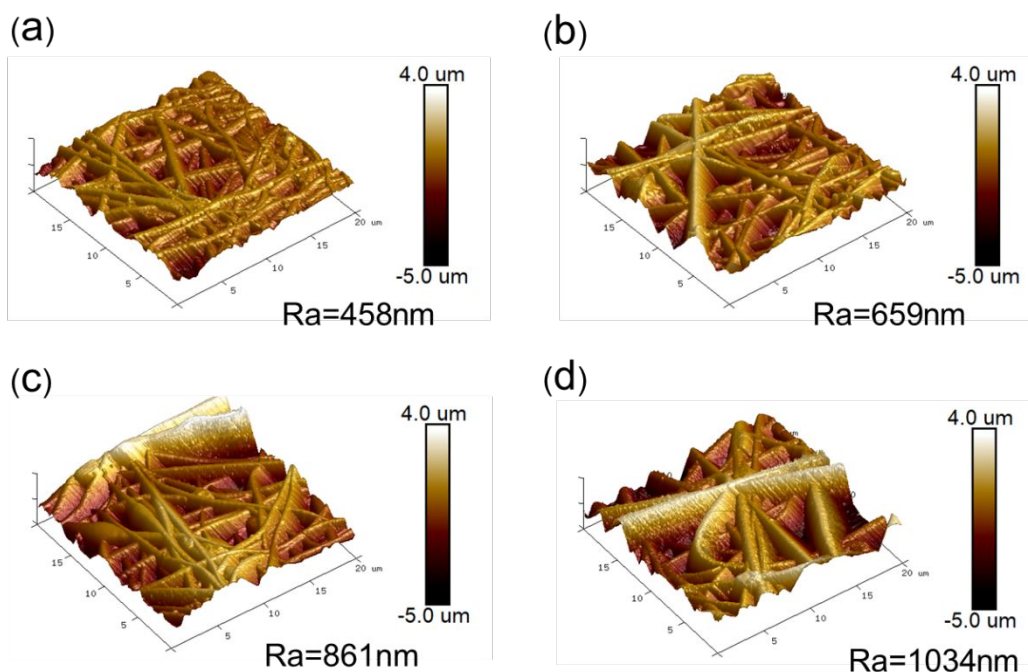

**Figure S4.** AFM images of armor-structured NFMs. (a) 0 wt%-PTFE-PH/PVDF NFM (PVDF/PH NFM), (c) 2.5 wt%-PTFE-PH/PVDF NFM, (d) 5.0 wt%-PTFE-PH/PVDF NFM, and (e) 10.0 wt%-PTFE-PH/PVDF NFM

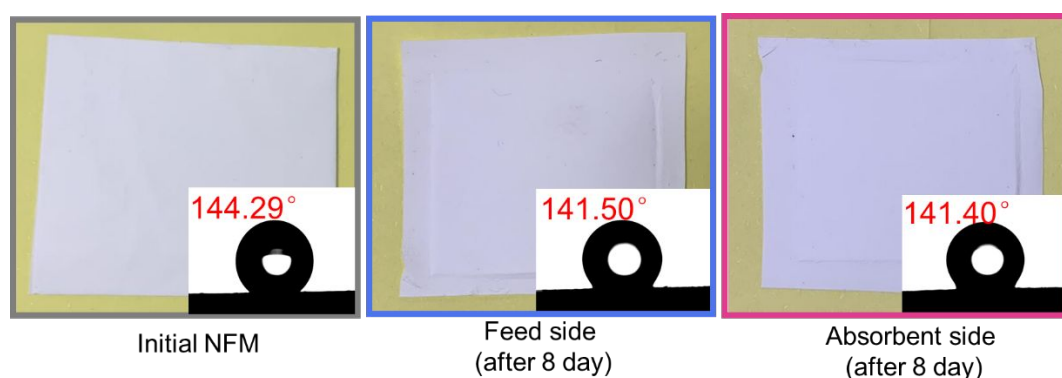

**Figure S5.** Water Contact Angles on both sides of armor-structured membrane before and after 8-day intermittent operation

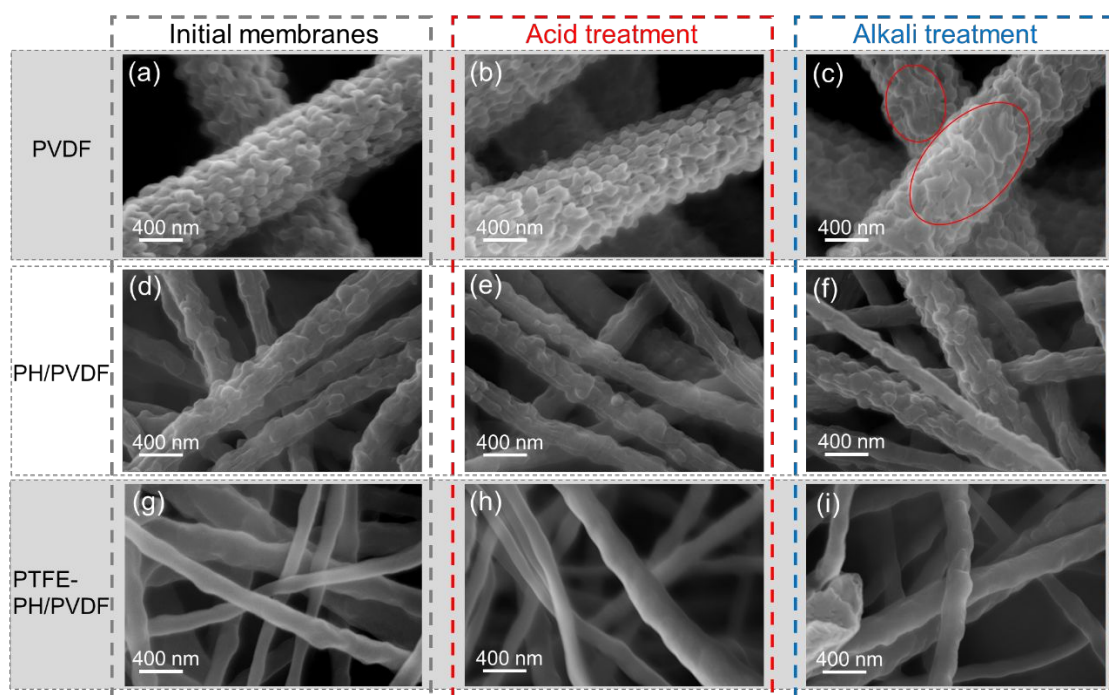

**Figure S6.** SEM of (a) PVDF NFM, (b) PVDF NFM treated with acid for 3 days, (c) PVDF NFM treated with alkali for 3 days, (d) Armor-structured NFM without PTFE doping (PH/PVDF NFM), (e) PH/PVDF NFM treated with acid for 3 days, (f) PH/PVDF NFM treated with alkali for 3 days, (g) Armor-structured NFM with PTFE doping (PTFE-PH/PVDF NFM), (h) PTFE-PH/PVDF NFM treated with acid for 3 days, (i) PTFE-PH/PVDF NFM treated with alkali for 3 days.



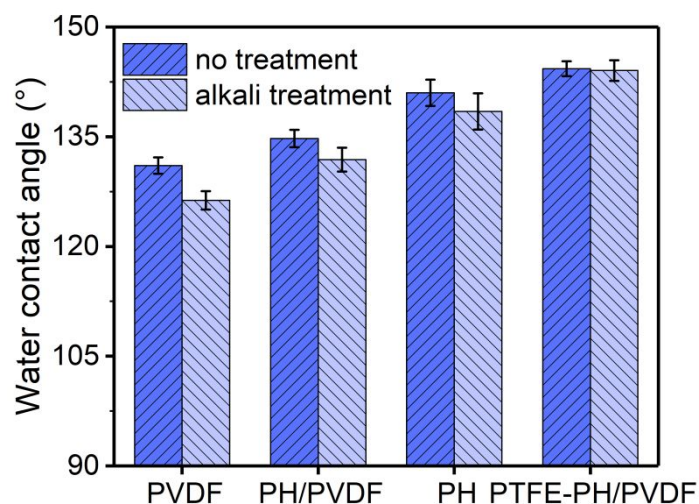

**Figure S7.** The change of Water Contact Angle of different nanofibrous membranes before and after alkali treatment.

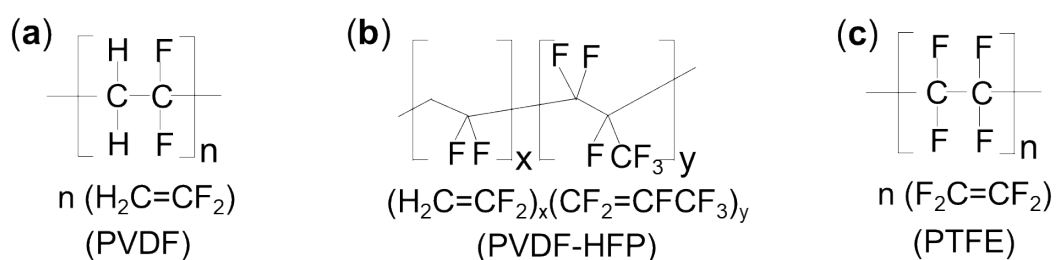

**Figure S8.** Molecular structure of PVDF (a), PVDF-HFP (b), and PTFE (c).

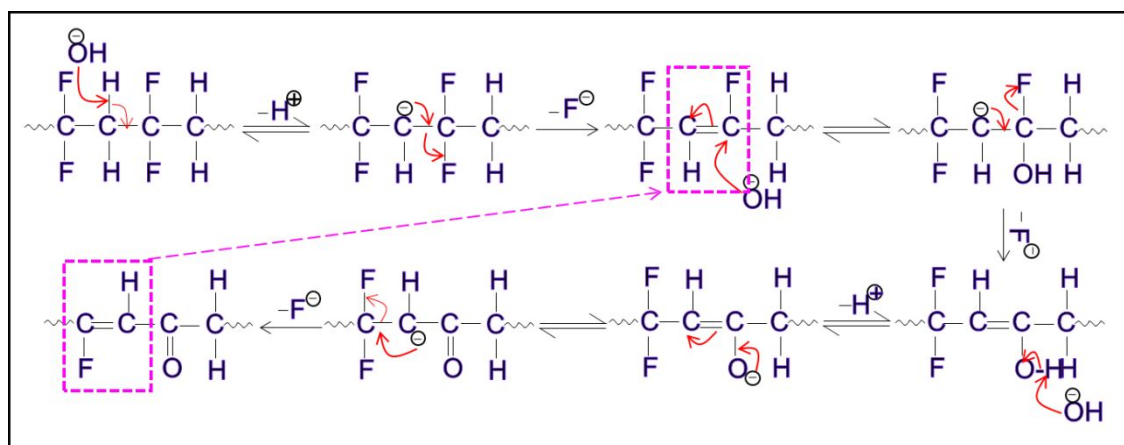

**Figure S9.** Defluorination mechanism of PVDF in alkaline condition.

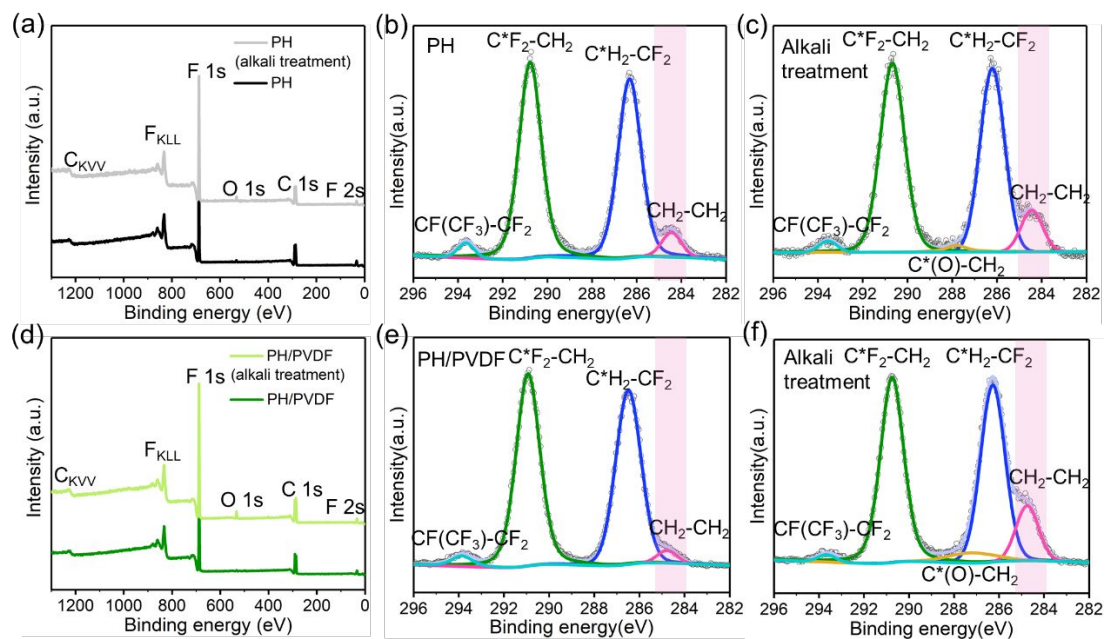

**Figure S10.** Element component analysis of the surface of PH (a) and PH/PVDF (d) NFM before and after alkali treatment; C 1s XPS spectra of PH NFM before (b) and after (c) alkali treatment; C 1s XPS spectra of PH/PVDF NFM before (e) and after (f) alkali treatment.



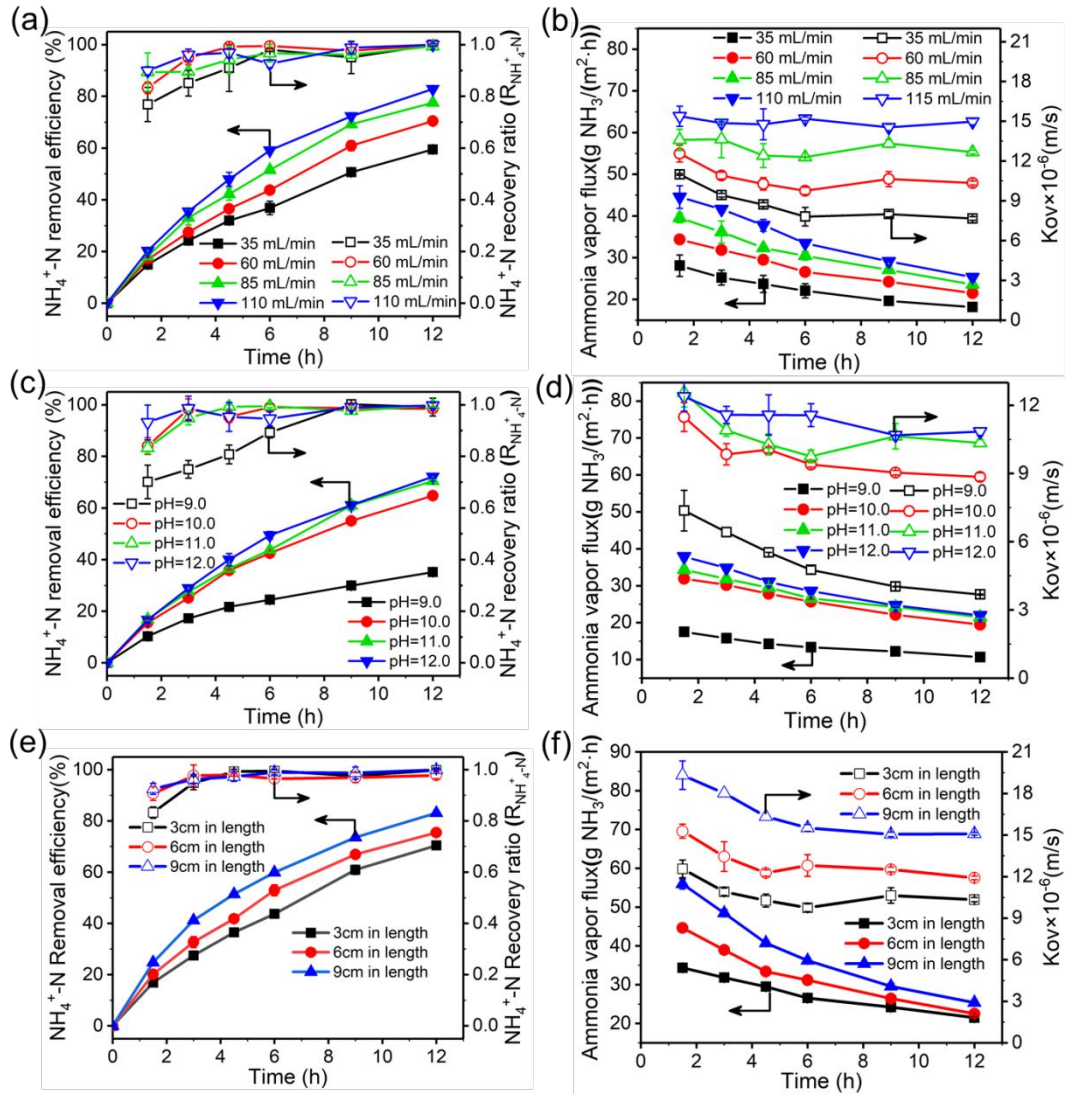

**Figure S11.** Effect of different parameters on GMAR process.  $\text{NH}_4^+\text{-N}$  removal efficiency and recovery ratio versus time at different flow velocity (a), pH (c), and module size (e); Ammonia flux and Kov versus time at different flow velocity (b), pH (d), and module size (f).

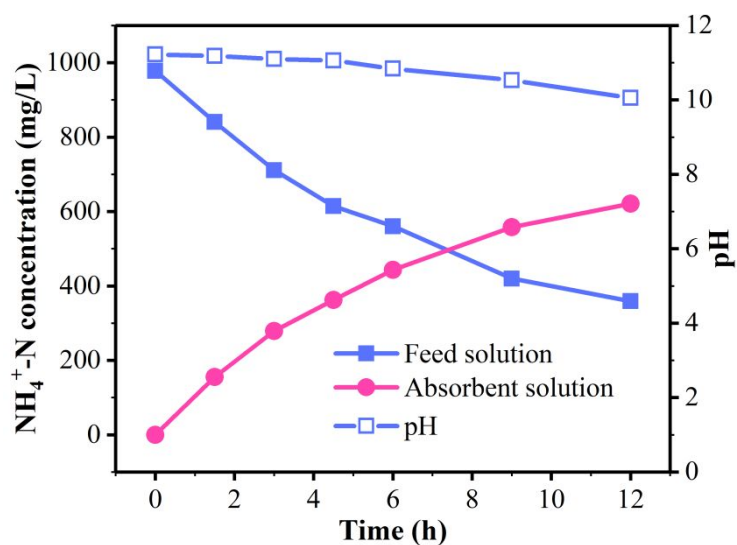

**Figure S12.**  $\text{NH}_4^+\text{-N}$  recovery performance of PTFE with pore size of 1  $\mu\text{m}$ .

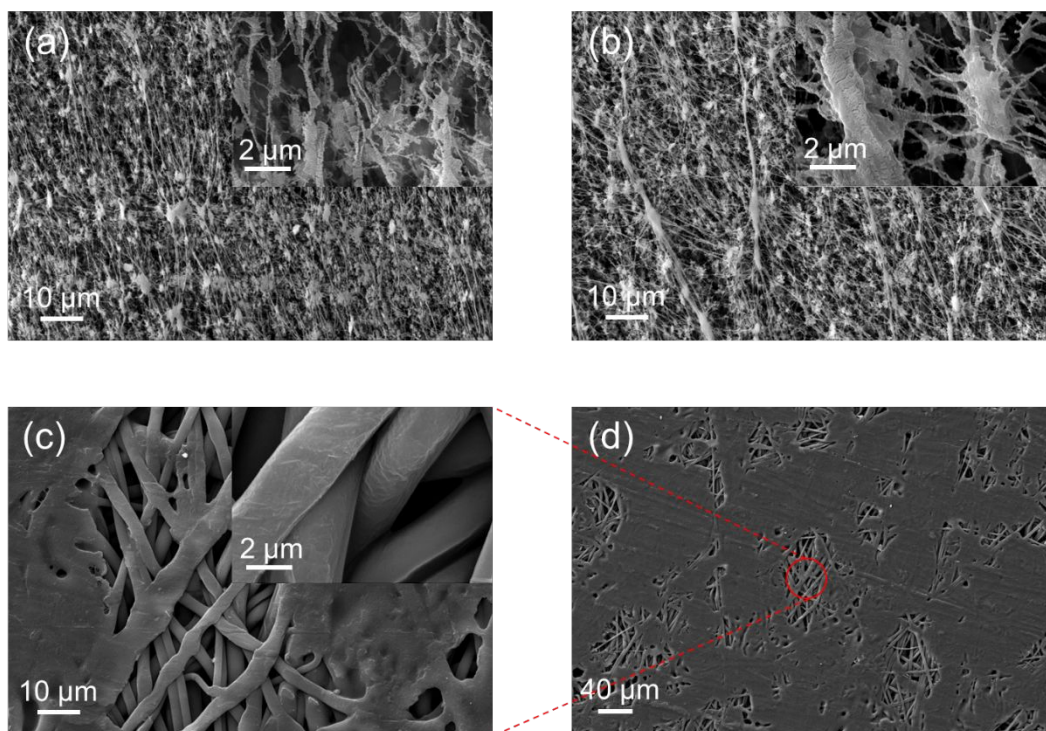

**Figure S13.** SEM images of commercial PTFE membranes with different pore size of (a) 0.45  $\mu\text{m}$  and (b) 1.0  $\mu\text{m}$ , respectively, (c) and (d) SEM images of commercial PP membranes.

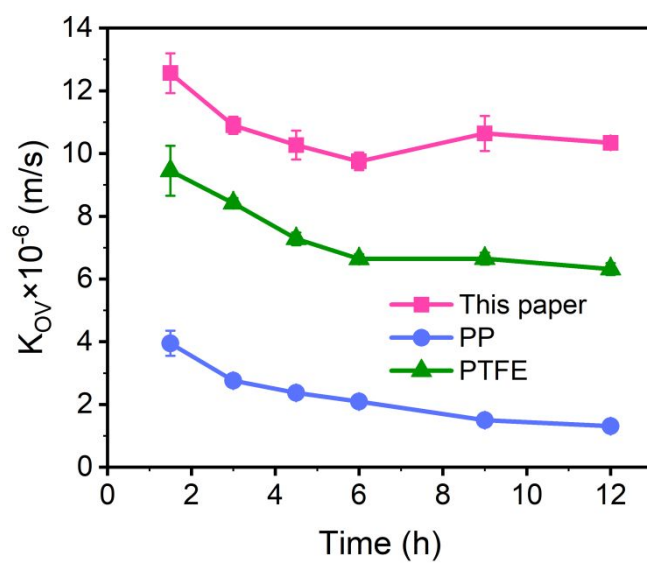

**Figure S14.** The overall mass transfer coefficient of different membranes.

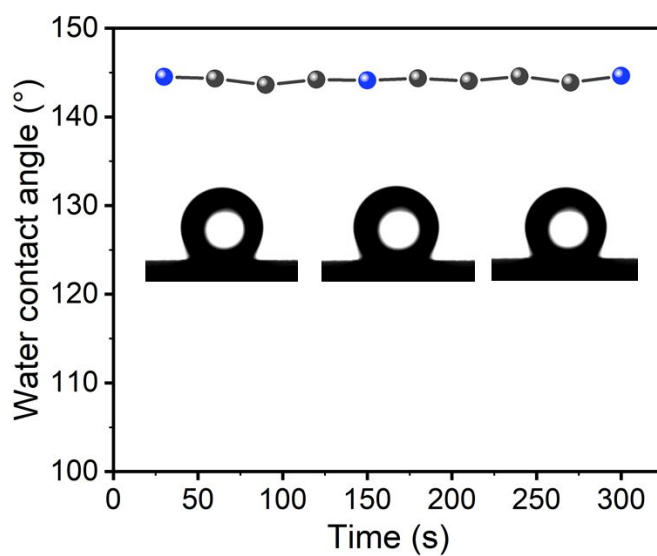

**Figure S15.** The hogger wastewater contact angle of armor-structured NFM.

## REFERENCE

1. Zhong, L.; An, L.; Han, Y.; Zhu, Z.; Liu, D.; Liu, D.; Zuo, D.; Wang, W.; Ma, J. In Situ Three-Dimensional Welded Nanofibrous Membranes for Robust Membrane Distillation of Concentrated Seawater. *Environ. Sci. Technol.* **2021**, *55*, (16), 11308-11317.
2. Zhu, Z.; Liu, Y.; Hou, H.; Shi, W.; Qu, F.; Cui, F.; Wang, W. Dual-Bioinspired Design for Constructing Membranes with Superhydrophobicity for Direct Contact Membrane Distillation. *Environ. Sci. Technol.* **2018**, *52*, (5), 3027-3036.
3. He, L.; Wang, Y.; Zhou, T.; Zhao, Y. Enhanced ammonia resource recovery from wastewater using a novel flat sheet gas-permeable membrane. *Chem. Eng. J.* **2020**, *400*.
4. Deka, B. J.; Lee, E.-J.; Guo, J.; Kharraz, J.; An, A. K. Electrospun Nanofiber Membranes Incorporating PDMS-Aerogel Superhydrophobic Coating with Enhanced Flux and Improved Antiwettability in Membrane Distillation. *Environ. Sci. Technol.* **2019**, *53*, (9), 4948-4958.
5. Murphy, K. R.; Butler, K. D.; Spencer, R. G. M.; Stedmon, C. A.; Boehme, J. R.; Aiken, G. R. Measurement of Dissolved Organic Matter Fluorescence in Aquatic Environments: An Interlaboratory Comparison. *Environ. Sci. Technol.* **2010**, *44*, (24), 9405-9412.
6. Chen, W.; Westerhoff, P.; Leenheer, J. A.; Booksh, K. Fluorescence excitation - Emission matrix regional integration to quantify spectra for dissolved organic matter. *Environ. Sci. Technol.* **2003**, *37*, (24), 5701-5710.
